# Supplementary material for: Crystal structure and functional implication of bacterial STING
Source: PubMed Central journal article supplement (PMC8748872; doi:10.1038/s41467-021-26583-3), 2022-01-10
Supplement: 41467_2021_26583_MOESM1_ESM.pdf [file 41467_2021_26583_MOESM1_ESM.pdf]

## Supplementary Information

### **Crystal structure and functional implication of bacterial STING**

Tzu-Ping Ko<sup>1,7</sup>, Yu-Chuan Wang<sup>2,7</sup>, Chia-Shin Yang<sup>2,7</sup>, Mei-Hui Hou<sup>2,7</sup>, Chao-Jung Chen<sup>3,4</sup>, Yi-Fang Chiu<sup>2</sup> and Yeh Chen<sup>2,5,6,\*</sup>

<sup>1</sup> Institute of Biological Chemistry, Academia Sinica, Taipei 115, Taiwan

<sup>2</sup> Institute of New Drug Development, China Medical University, Taichung 406, Taiwan

<sup>3</sup> Graduate Institute of Integrated Medicine, China Medical University, Taichung 406, Taiwan

<sup>4</sup> Proteomics Core Laboratory, Department of Medical Research, China Medical University Hospital, Taichung 404, Taiwan

<sup>5</sup> Research Center for Cancer Biology, China Medical University, Taichung 406, Taiwan

<sup>6</sup> New Drug Development Center, China Medical University, Taichung 406, Taiwan

<sup>7</sup>These authors contributed equally to this work: Tzu-Ping Ko, Yu-Chuan Wang, Chia-Shin Yang, Mei-Hui Hou

\* To whom correspondence should be addressed. Email: [chyeah6599@mail.cmu.edu.tw](mailto:chyeah6599@mail.cmu.edu.tw)

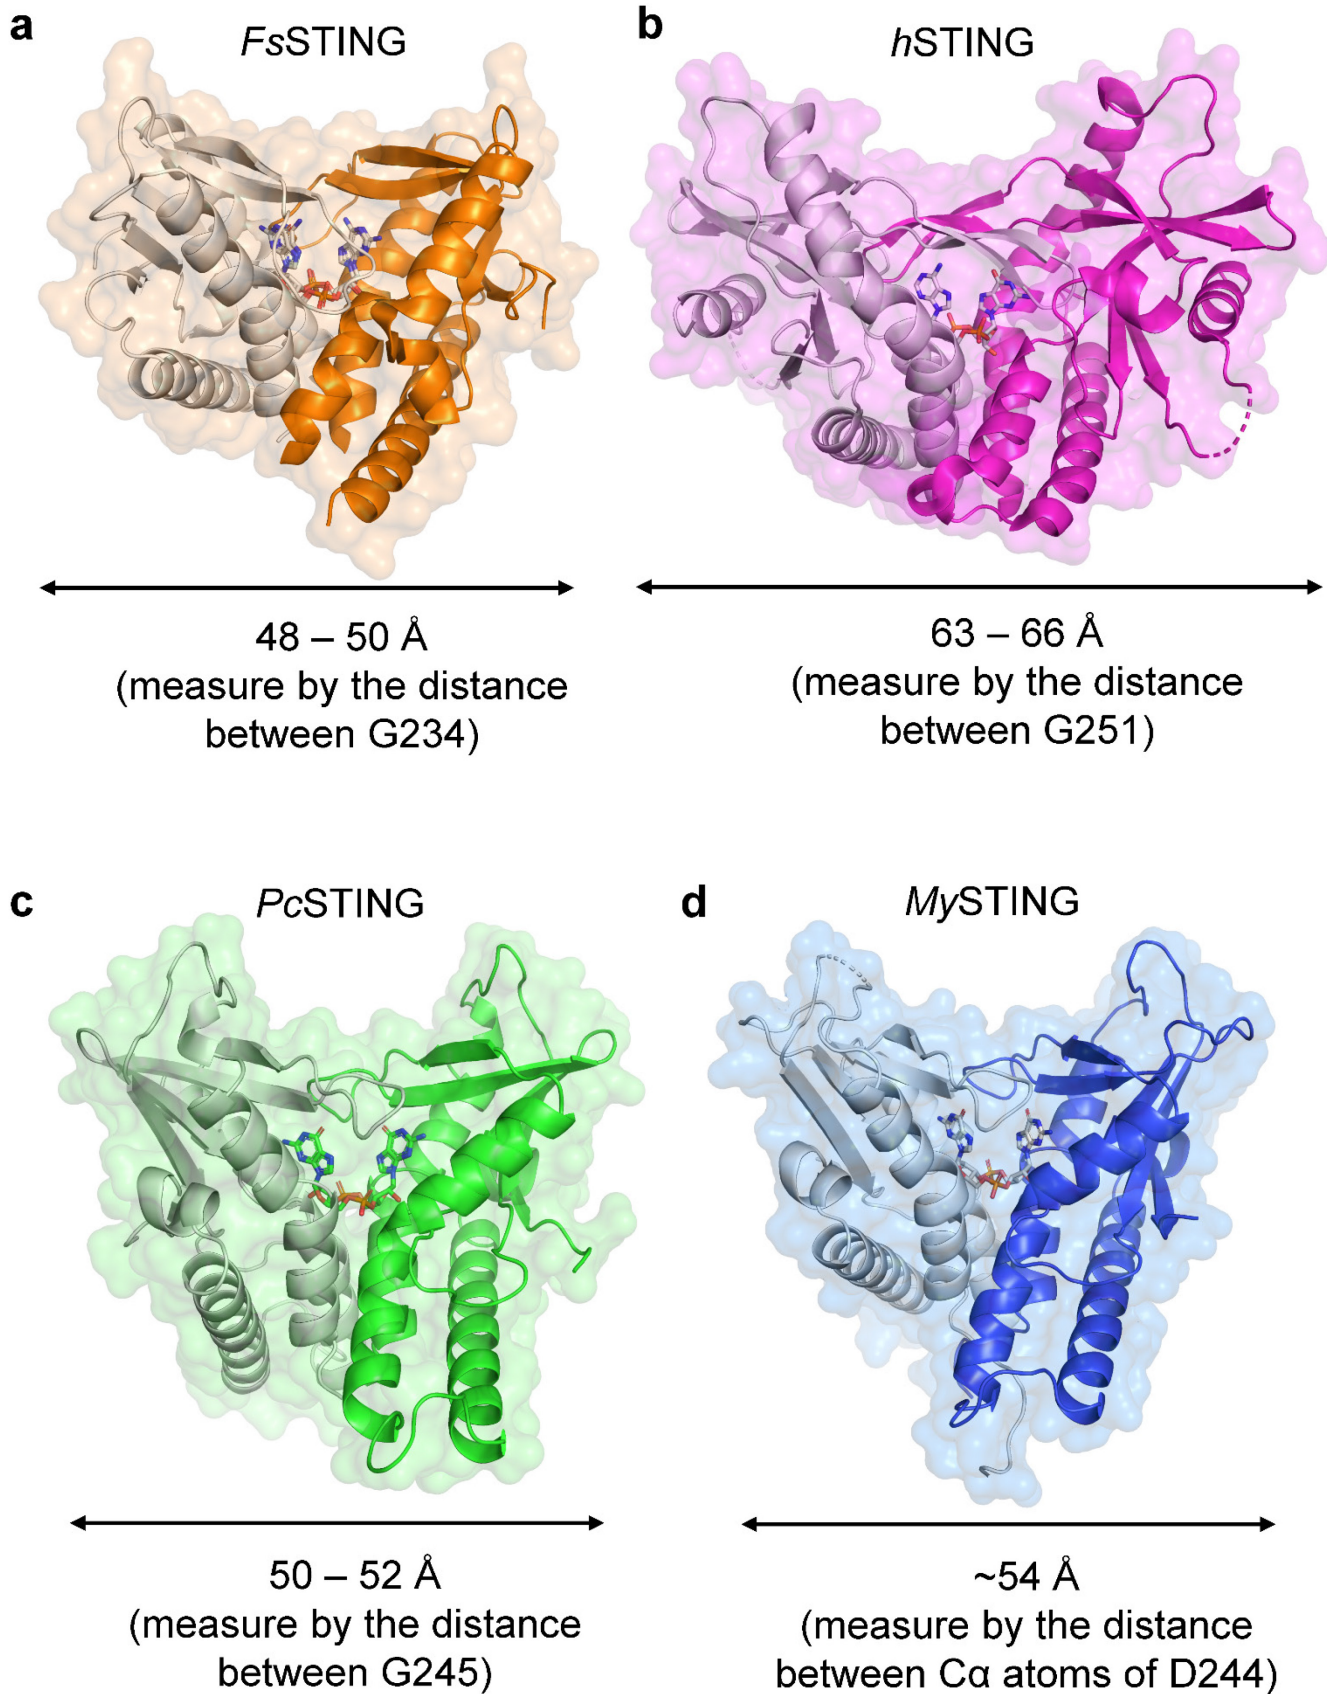

**Supplementary Fig.1. Overall architecture of STING family proteins**

(a) *Fs*STING-3'3'-cGAMP complex (orange, PDB: 6WT4). (b) *h*STING-2'3'-cGAMP complex (magenta, PDB: 4KSY). (c) *Pc*STING-CDG complex (green, PDB: 7EBD). (d) *My*STING-CDG complex (blue, PDB: 7EBL). The dimension of each STING dimer is indicated.

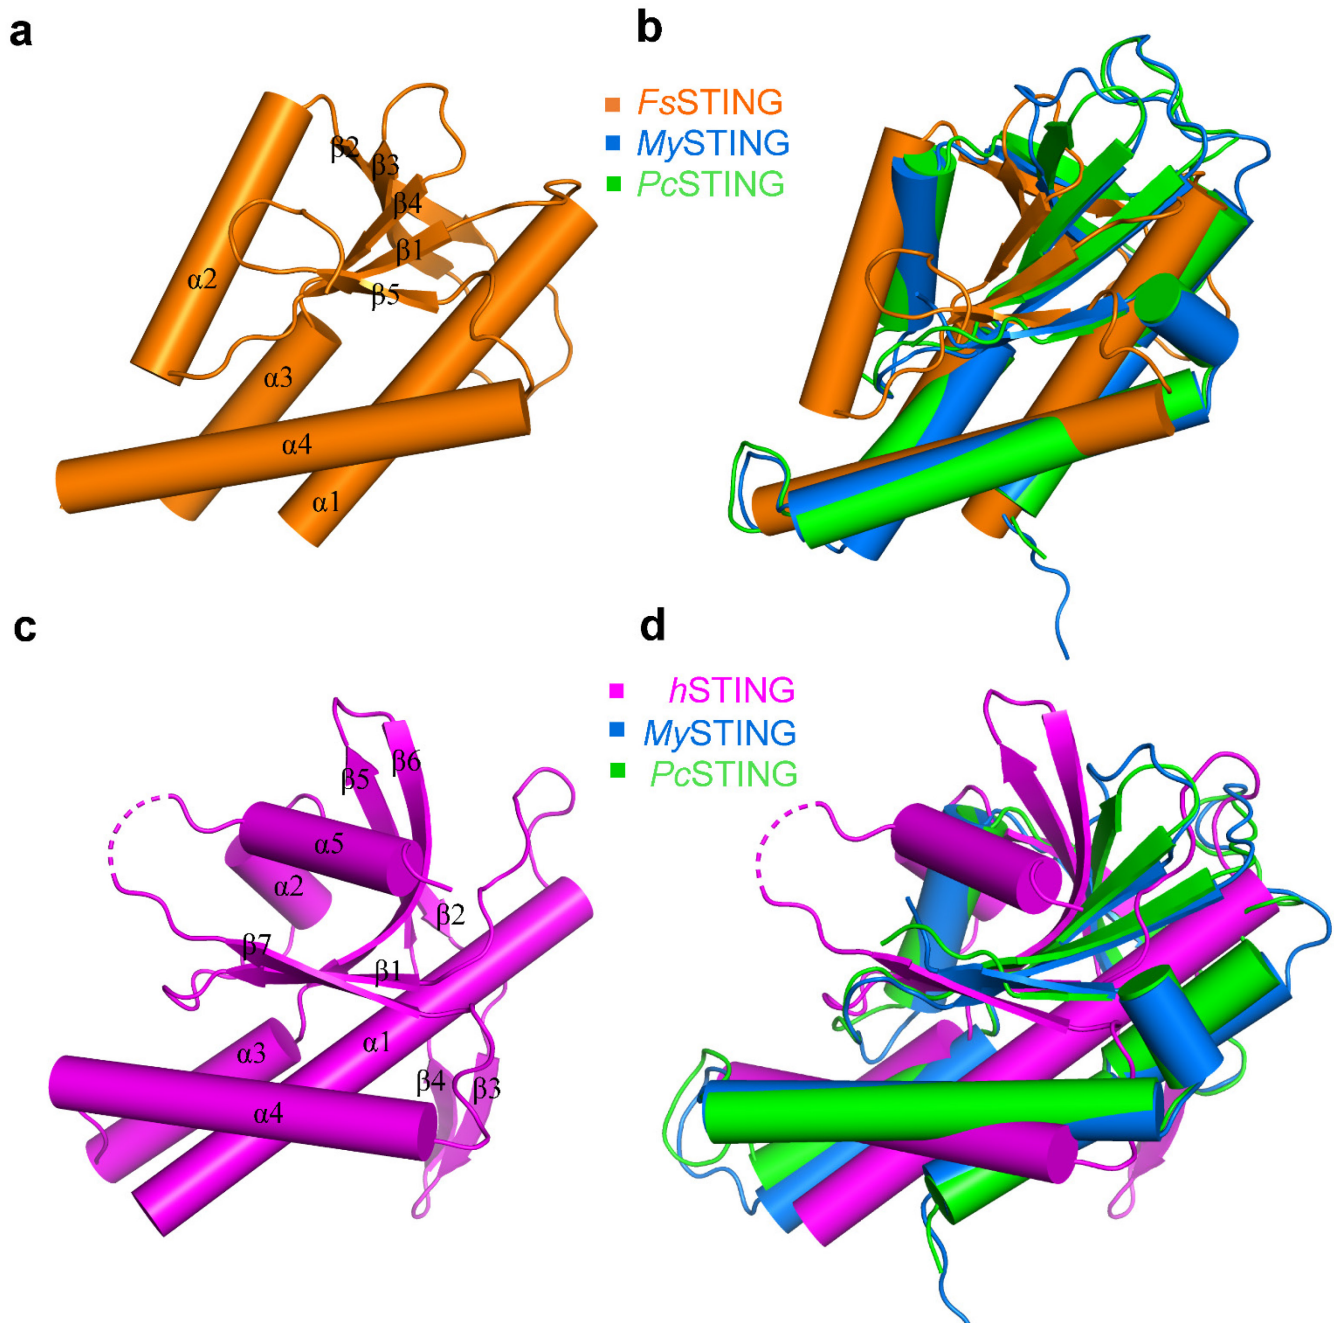

**Supplementary Fig. 2. Comparison of the protomeric structure of STING family proteins**

(a) Cartoon representation of the protomeric structure of *FsSTING* (orange, PDB: 6WT4) with the four  $\alpha$ -helices and five  $\beta$ -strands indicated. (b) The superimposed protomeric structure of *PcSTING* (green) and *MySTING* (blue) with *FsSTING*. (c) Cartoon representation of the protomeric structure of *hSTING* (pink, PDB: 4KSY) with the five  $\alpha$ -helices and seven  $\beta$ -strands indicated. (d) The superimposed protomeric structure of *PcSTING* (green) and *MySTING* (blue) with *hSTING*.



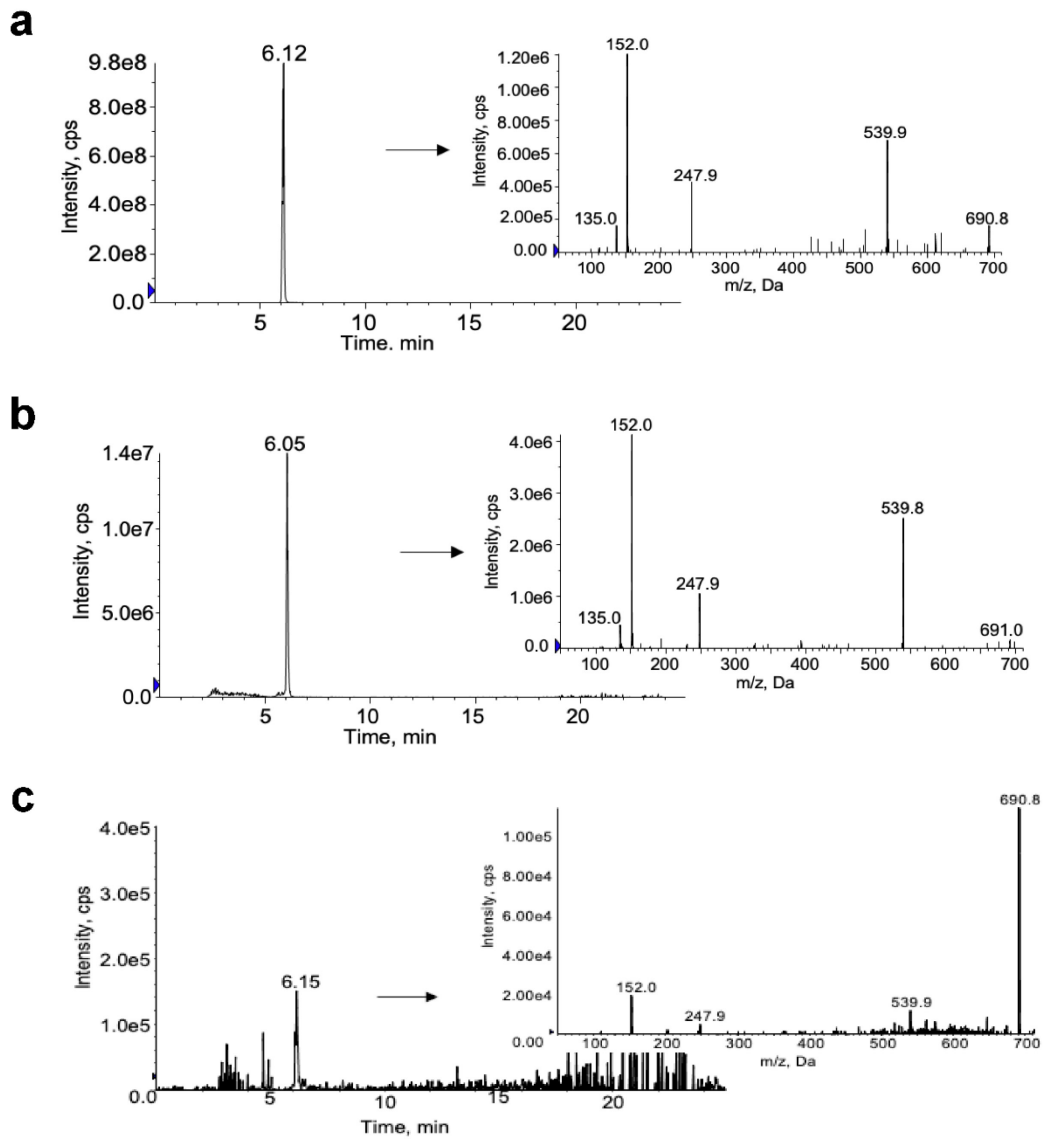

### Supplementary Fig. 3. LC-MS/MS analysis of the bacterial STING protein samples

LC-MS/MS analysis using enhanced product ion scan with targeted mass of  $m/z$  691.1. Extracted ion chromatograms (XIC) of a fragment ion ( $m/z$  152.0) and its mass spectrum from (a) a chemical standard of cyclic di-GMP, (b) a sample of *Pc*STING, (c) a sample of *My*STING.

↓

|         |                                                               |     |
|---------|---------------------------------------------------------------|-----|
| FsSTING | FIFPAITQIKENGEV---NPK-----ICIIYKPKHFDELTSTNIDMIKAELTNKKYNL    | 140 |
| PsSTING | LLLPTCKYIIDQDGF-DYESVQ--YRDCIIKVIIPNRLN----TDVNLQFA-QLKRNRYQT | 220 |
| CsSTING | FIKPTCTHLVNDGL-DDEGTK--YKECKLKIIIPERLT----TDVNLQFQ-NIKRKFSL   | 220 |
| RaSTING | FVKPTCLHIQNGGIQDDDGTK--YENSTIKIIIPQKLT----TDVNSQFQ-TLKKSFQT   | 223 |
| CgSTING | FIKPTCSHIINNGGLLDKNGYI--YKCKTIKIIIPKLT----SDVNSQFQ-RIKAKIET   | 223 |
| SaSTING | LVAPTCKFLIKNKGY-KLNGIQ--YEKFKLKIIIPDKIV---VDPNIAFE-KIKSKLST   | 219 |
| NdSTING | LIVPICRFIIDNNGF-TKGDTH--YQKCKLNIIIPERIN---QDVNLQFE-KLKGLFTT   | 220 |
| MsSTING | FIKALCVKIVQDGKL-KIKDAE--YDKCKFQIIIPKID---EDINLQFE-KIKRETGV    | 217 |
| TmSTING | FIKYVNEYIINNGGF-IYEGKK--YGDCVFKIMIPETLS---DNLNLQFQ-KEQNRIGV   | 216 |
| AaSTING | FIKYVCEHFVMNKGf-EFQNKl--HDNCKFKIMIPNTLP---NDLNMAFQ-KIQNKIGV   | 215 |
| WaSTING | FVKHVCEHYVKNNGF-TYKNNN--YDPCKLRIIIIPYKLP---NDLNLAfN-KIQNDIGV  | 216 |
| SfSTING | FIKRvCEEIHG-SECVELEGKKIKVKSFRVDVVIPETLD---DNGVGNFTTLYNKRYGL   | 219 |
| DfSTING | FVLPVSRELMQ-SEKRSVEGLN--FADFTLNIVIPDELp---NNF-QDEVIAYLGTHNL   | 213 |
| MySTING | LVNIIICESLNM-LPKLEVSgKE--YKFKFTIVIPKDLd---ANI-KKRAKIYFKQKSL   | 220 |
| ChSTING | FVSTVCDALHS-LPTIKLNGIE--YKDFVFNIIIPNDLD---ADI-KRRAQIYFKKMDI   | 220 |
| DaSTING | FIQLVCDSIGS-GYEMSVNGKN--YTNAKLKIVLPKDLd---SDL-KKKATIYHKKNSF   | 224 |
| PcSTING | FVKLAAEWIVTEMPTEIDGKT--YTSgKLYIKMPETLD---TDI-KKSAMLFYKQGL     | 223 |
| BuSTING | FVKLAAEWLTENTPGLIDGTQ--YDKGILKIVMPDSDLd---ADI-KKCAMLyYKKGGL   | 224 |
| LbSTING | FVKLAAEWLVENTPELMINNHK--FNKASLKIVMPESLD---TDI-KRSAMMYKRHGL    | 224 |
|         | :: . : * : :                                                  |     |

↓ ↓

|         |                                                              |     |
|---------|--------------------------------------------------------------|-----|
| FsSTING | SEINLSL----K GARARDILTLNK-----KSKIHSYDFPNTLLSLYSYVDFKIASSN   | 189 |
| PsSTING | KTVSfQY----AGRPRNINLDTEIK-----DGKLIFIDFPTTLSGINyAISNLLPNDF   | 269 |
| CsSTING | KKLSFDY----AGRPRNIEVEAIIN-----DNKVFIDFPTVLSGINyAISNLLPNDF    | 269 |
| RaSTING | KKLTFDY----LGRPRNIDVETLIQ-----DGKLYVIDFPTVLSGINyAISNLLPNDF   | 272 |
| CgSTING | KELSFey----LGRPRNINVEIIAE-----DGEVMIIDFPTILSGINyAISNLLPQDF   | 272 |
| SaSTING | TKIDIDY----SGRPRSIHHETIIK-----DNIIEFIDFPTIITGINfAISNLLPSEF   | 268 |
| NdSTING | ENVSfKY----SGRPRQISVDtQIK-----NDTLEFIDFPTIITGINhAISNLLPNDF   | 269 |
| MsSTING | EQVQIEC----LGRPRPFQVNSKLL-----ETGELLIIDFpSTLTGINyAIRELLPEEY  | 267 |
| TmSTING | EKISfGS----TNRPRNIGVDISIT-----DENKILIDFPTTLSGINhAISYLLPKEY   | 266 |
| AaSTING | EKISfGA----TGRVRNVHVDVKIE-----NGQLILLDFPTTLTGIDhAISNLLPNdY   | 264 |
| WaSTING | DKLSfSA----FGRPRNVYVDAKVv-----GGKILLDFPTTLTGIDyAISNHLPKDY    | 265 |
| SfSTING | SKATTCTNPALLGTRGFpFHFKVDPpDANQESpVDTHLLDIPSTLSTIVESLKLyLPSNq | 279 |
| DfSTING | KEMKVET-----VTRKFNfyLDyDYA-----NQESLNLYDLPTTLGALKRAIEMAVPNsY | 263 |
| MySTING | IEIEIPT-----SSRNyPIHIQFDENS----TDDILHLYDMPTTIGGIDKAIEMfMRKGh | 271 |
| ChSTING | HEVKIDT-----NGRSfPLYLQIDEEN----SGDVAVLyDMPTTLGGIDKAIEMyMKKGh | 271 |
| DaSTING | EQLQIET-----KHRQYPLYVSIDS-----HYDSLILSDMPTTLNGIDKAIDMyLRVGH  | 273 |
| PcSTING | NETQmST-----NHRNyPIHIVSKE-----EGDTLEVYDMPTILSGIDKAIDMyFRVGH  | 272 |
| BuSTING | KEAKIDT-----KQRsYPIHFATKD-----GEDSLIEYDMPTILTGIDKAIDMyFRVGH  | 273 |
| LbSTING | EeARIDT-----KHRNyPIHFASKT-----EDGILEVYDMPTILTGIDKAIDMyFRVGH  | 273 |
|         | * . *: . : : .                                               |     |

↓ ↓

|         |                                                      |     |
|---------|------------------------------------------------------|-----|
| FsSTING | NNSSELKKKKFVELLIEQFYlKLNELIQENNLtNNIT-FC---DKNLQGL-- | 235 |
| PsSTING | NSMS-VDYETIIEREIERfVYTLKQLALRNGVD-TLLEIERI-----      | 309 |
| CsSTING | NKMS-PDYDSIIQREFERfIYTLKkLALRDGFd-SfIEIVKEQEM-----   | 312 |
| RaSTING | NSMS-DDYELILNREFDRfIYTLNKLALRDGYN-NLITVINEKDIK-----  | 316 |
| CgSTING | NSMS-VDYEAILSRELERfVYTLKkIALRDGFd-DLlKIVDEDN-----    | 314 |
| SaSTING | NDLT-SDYNLIVERELEKFILTLKQLLLRNNFD-EDVEIIREGTFNKNGANV | 318 |
| NdSTING | NKQS-PDYSSILDRELRRfITTLKkLLIRGGFD-EMVNVKRdSEL-----   | 312 |
| MsSTING | KTFG-DEYENILNRELEKFVYTLNGLIKKNSFD-DFIEIVRV-----      | 307 |
| TmSTING | REHS-QDYKIIERELNKFIESLEIIIFQRNNCN-DFVIERF-----       | 306 |
| AaSTING | KNQT-NDYKLIIDRELNKFmSTLkKtIEKNEYD-DFVIERI-----       | 304 |
| WaSTING | KHQT-DDYNLIIEERELNKFIDTLNkILTKNDFD-EFVEIVRS-----     | 305 |
| SfSTING | VGQD-FDMDYLEMRELENfAKVLKYlGRNAATKGYVNVLTNVKL-----    | 323 |
| DfSTING | YGES-ERERVfKKkEMNNFCRALTYLVGNNSITKKkVKITMVDV-----    | 306 |
| MySTING | IGKT-DQQLLEERELRNfKTTLENLIATDAfAKEMVEVIEE-----       | 313 |
| ChSTING | IGKT-SQQQLLEERELRNfKTTLINLInNNSfTKTFVKVIEE-----      | 312 |
| DaSTING | IGKS-TEQQLLEERELRNfEMVLRKLVANDAFCKEFVEfITEP-----     | 315 |
| PcSTING | IGKT-TEQQLAEDNEMNNfKRVLQLLINEDSfCRECVEIL-----        | 311 |
| BuSTING | IGKK-IEQELAEENEMNNfRRVLQLLINEDAFCRECVVII-----        | 312 |
| LbSTING | IGKT-NEQKLAEDHEMNNfKRVLQLLINEDAFCRECVEIIEPQP-----    | 316 |
|         | : .* * . .                                           |     |

#### **Supplementary Fig. 4. Multiple sequence alignment of bacterial STING domains in CBASS immunity system**

The conserved residues in  $\beta$ -strand lid that constitute the RXR or RX(Y/F) motif which determine the ligand specificity of bacterial STING proteins are indicated by red arrows. The residues involved in oligomerization of bacterial STING proteins identified in this study are indicated by blue arrows. *Ps*STING, *Pedobacter* sp. STING (IMG gene ID: 2524412210); *Cs*STING, *Chryseobacterium soldanellicola* STING (IMG gene ID: 2686056644); *Ra*STING, *Riemerella anatipestifer* STING (IMG gene ID: 2630660691); *Cg*STING, *Capnocytophaga granulosa* STING (IMG gene ID: 2694988876); *Sa*STING, *Siphonobacter aquaeclarae* STING (IMG gene ID: 2623612695); *Nd*STING, *Niabella drilacis* STING (IMG gene ID: 2620490221); *Ms*STING, *Moheibacter sediminis* STING (IMG gene ID: 2718374542); *Tm*STING, *Tenacibaculum maritimum* STING (IMG gene ID: 2568714955); *Aa*STING, *Arenibacter algicola* STING (IMG gene ID: 2574465590); *Wa*STING, *Winogradskyella arenosi* STING (IMG gene ID: 2771484051); *Df*STING, *Dyadobacter fermentans* STING (IMG gene ID: 644929227); *Ch*STING, *Chryseobacterium halperniae* STING (IMG gene ID: 2623152775); *Da*STING, *Dysgonomonas alginatilytica* STING (IMG gene ID: 2731877973); *Bu*STING, *Bacteroides uniformis* STING (IMG gene ID: 2565659645); *Lb*STING, *Lachnospiraceae bacterium* STING (IMG gene ID: 2800731183).

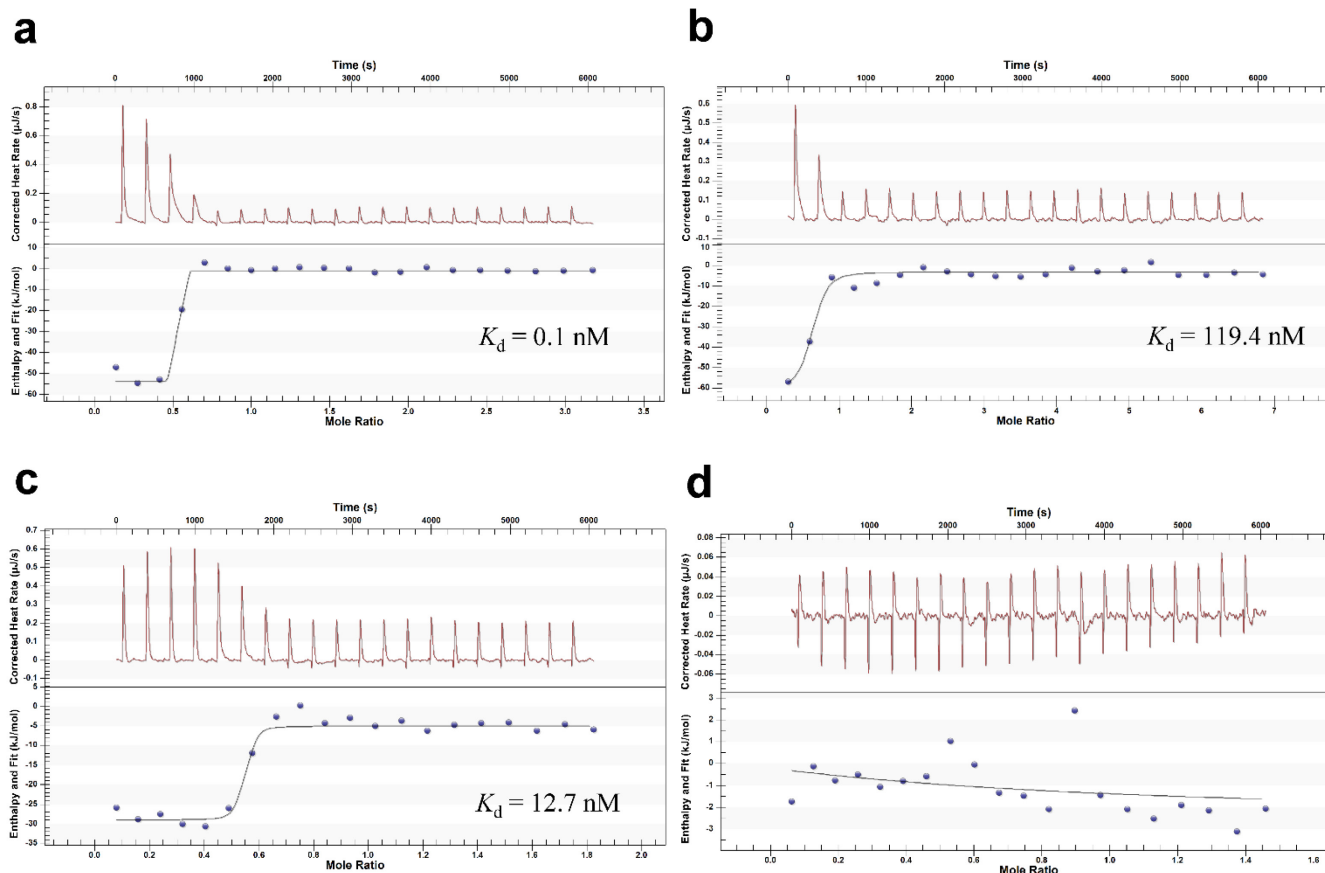

### Supplementary Fig. 5. ITC analysis of CDNs binding to bacterial STING proteins

Binding isotherm of (a) c-di-GMP, (c) 3'3'-cGAMP and (d) c-di-AMP to wild-type *MySTING* and (b) c-di-GMP to *MySTING\_Y232R*. Changing of one guanine base to adenine base (c-di-GMP to 3'3'-cGMAP) caused 127-fold decrease in binding affinity to wild-type *MySTING*. Changing of c-di-GMP to c-di-AMP abolished the interaction with wild-type *MySTING*. Mutating the specificity-determining residue Y232 of *MySTING* to arginine reduced the binding affinity of c-di-GMP by 1194-fold compared with wild-type *MySTING*.

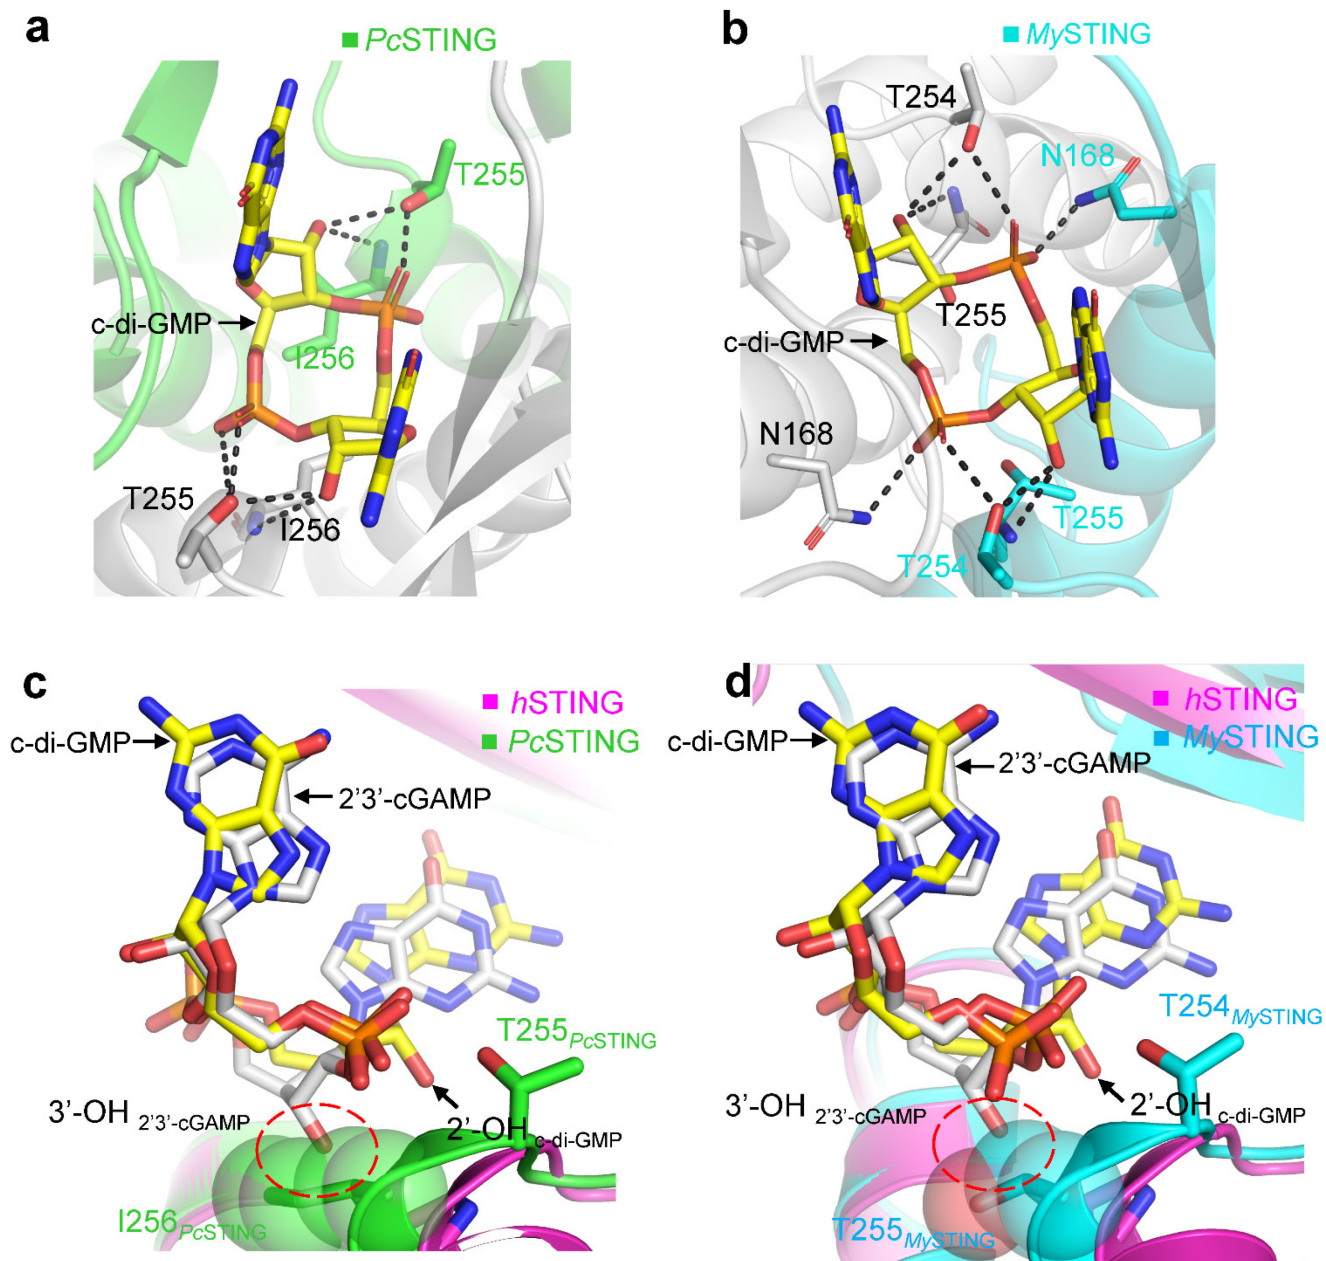

### Supplementary Fig. 6. Specificity for [3'-5', 3'-5'] phosphodiester bond linkage of bacteria STING

(a-b) The symmetric recognition of phosphodiester linkage of c-di-GMP by (a) *PcSTING* and (b) *MySTING*. The residues involved in hydrogen bonding (black dashed lines) are shown in stick.

(c-d) Superimposition of complex structure of human STING/2',3'-cGAMP (blue, PDB: 4KSY) with (c) *PcSTING*/c-di-GMP (green) and (d) *MySTING*/c-di-GMP (cyan). C-di-GMP and 2',3'-cGAMP are shown in yellow and white sticks, respectively. The possible steric clash between free 3'-OH of 2',3'-cGAMP and the side-chain of (c) I256 (green sphere) of *PcSTING* or (d) T256 (cyan sphere) of *MySTING* is highlighted by red dashed circles.



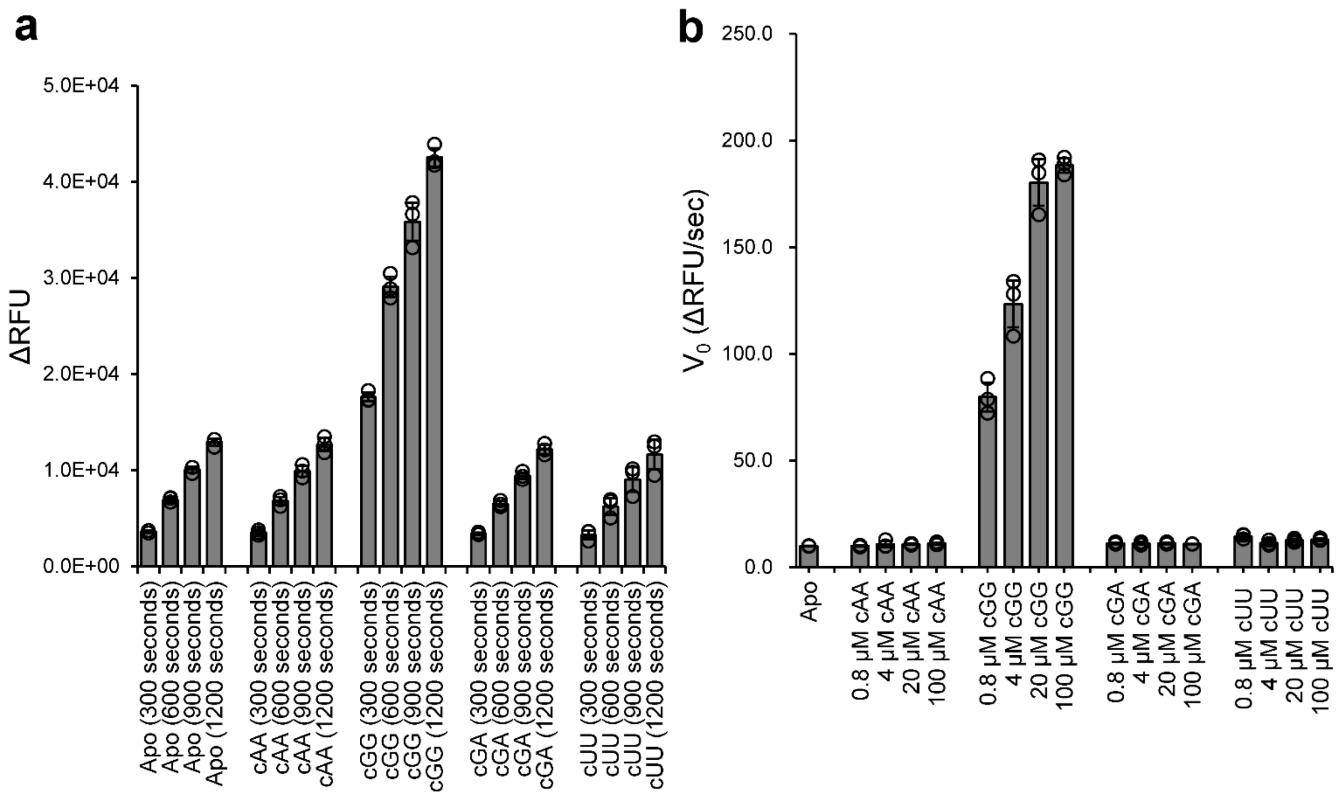

**Supplementary Fig. 7. Kinetic analysis of NADase activity of *MyTIR-STING* protein**

(a) Cleavage of fluorescent NAD<sup>+</sup> analogue, ε-NAD, by *MyTIR-STING* protein in different time points (300, 600, 900, 1200 seconds) in the absence or presence of different CDNs at the concentration of 100 μM. Data were represented as mean ± standard deviation for *n* = 3 independent replicates. (b) The initial velocity of NADase activity of *MyTIR-STING* protein in the absence or presence of different CDNs at different concentrations (0.8, 4, 20, 100 μM). Data were represented as mean ± standard deviation for *n* = 3 independent replicates.

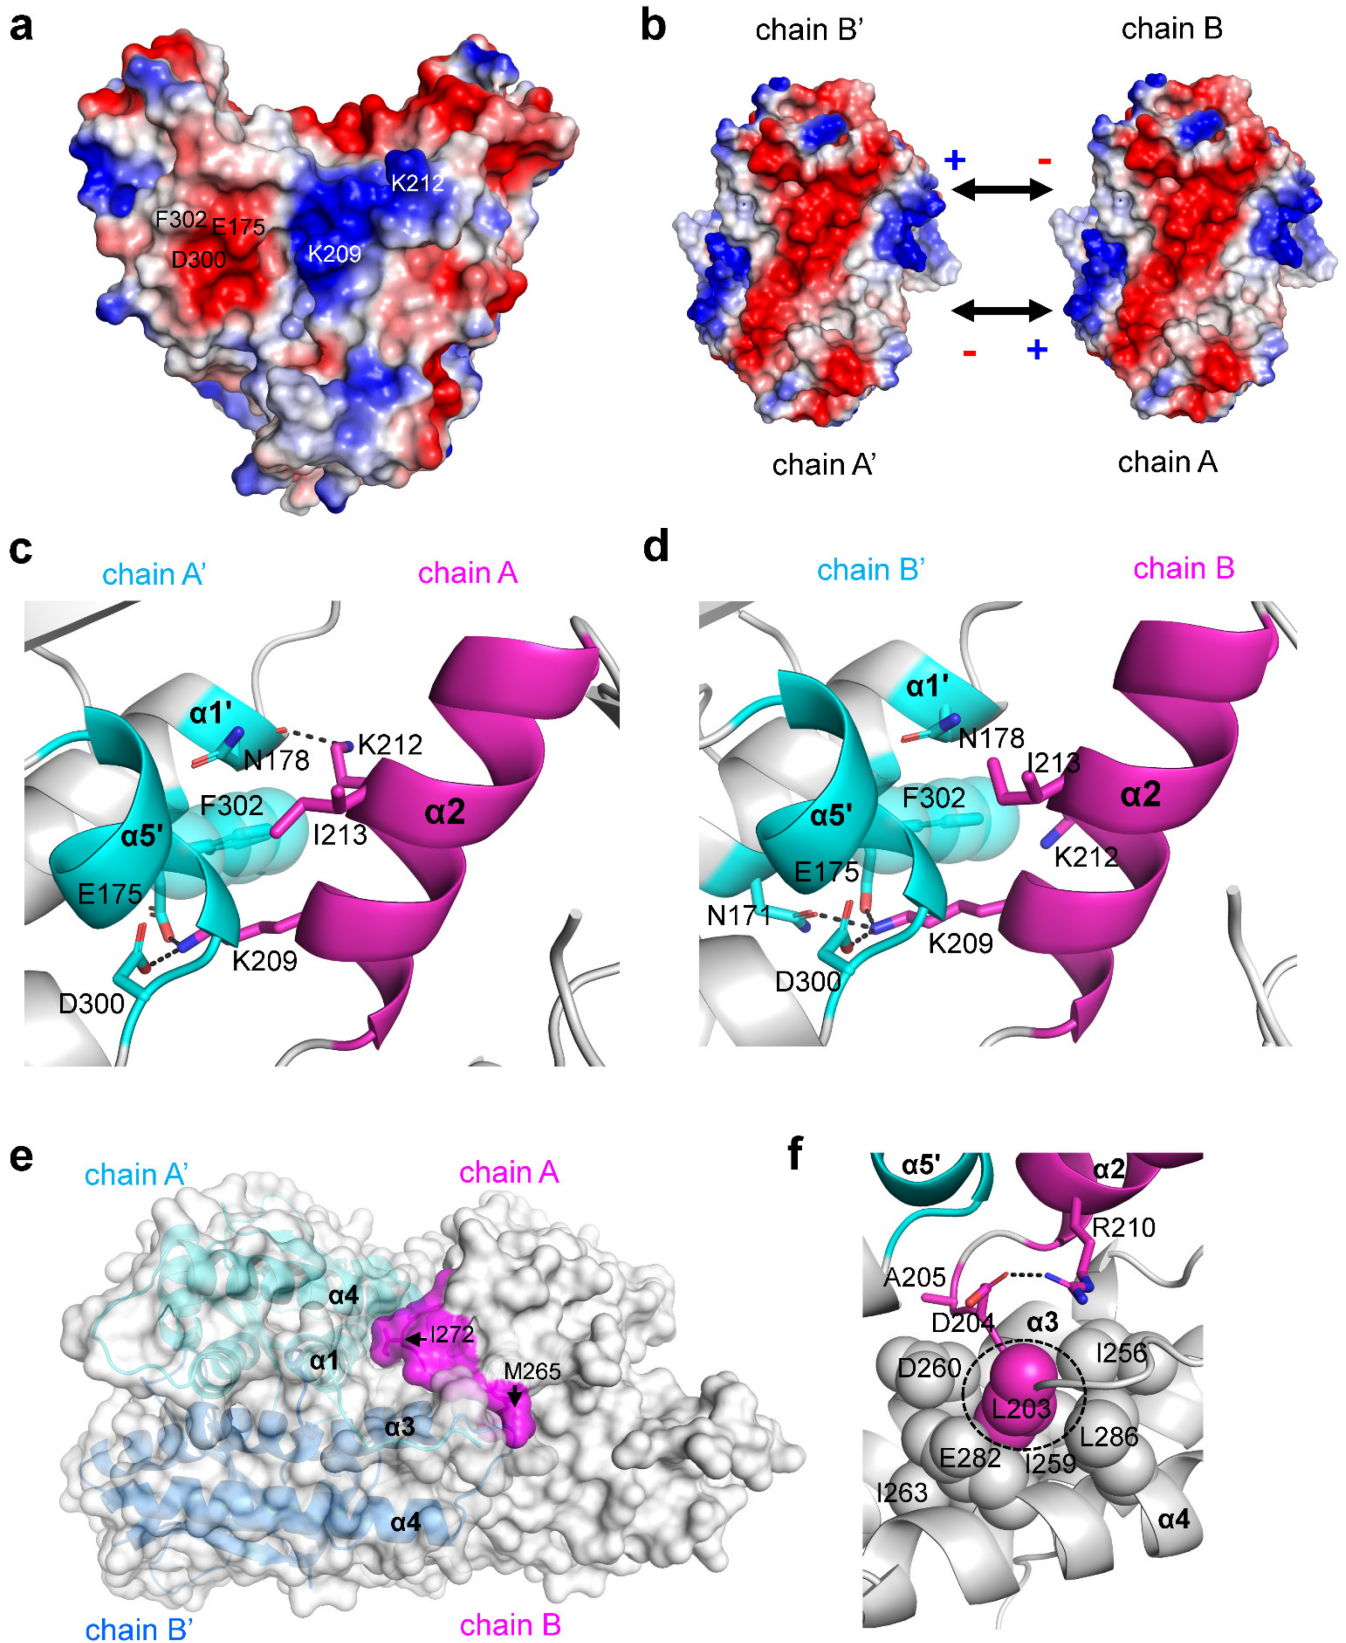

**Supplementary Fig. 8. The oligomerization mechanism of *MySTING* revealed by crystal packing**

(a) The electrostatic potential surface of a *MySTING* dimer. The surfaces are colored in blue for

positive potential (10 kcal/mol), red for negative (-10 kcal/mol) and white for neutral. The residues involved in electrostatic interaction and hydrophobic stacking are indicated. (b) Binding scheme of dimer-dimer interaction of *MySTING*. (c-d) The detailed view of the oligomerization interface shown in (b) between (c) chain A and chain A' or (d) chain B and chain B' of *MySTING*. The chain A/B of *MySTING* is colored in magenta while the chain A'/B' are colored in cyan. The interacting residues are shown in sticks. The H-bond and ionic bonds are indicated in black dashed lines. The residue F302 of *MySTING* are shown in sphere. (e) Surface representation of the *MySTING* tetramer. The  $\alpha$ 3- $\alpha$ 4 loop (magenta, residues 268-274) from chain A of one *MySTING* dimer make extensive hydrophobic interaction with  $\alpha$ 1 and  $\alpha$ 4 helix of chain A' (cyan) and another  $\alpha$ 3- $\alpha$ 4 loop of chain B' (blue) of the adjacent *MySTING* dimer. The sidechain of M265 and I272 participate in oligomerization are indicated by black arrows. (f) The predicted oligomerization interface (residues D119-S123) in *FsSTING* corresponds to the loop region before  $\alpha$ 2 helix in *MySTING*. Hydrophobic interacting residues are shown in sphere and hydrophilic interacting residues are shown in sticks. The conserved leucine residue (L203 in *MySTING*) that was mutated to arginine and prevented the filament formation in *SfSTING* is highlighted by black dashed circle. All the  $\alpha$  helixes are labeled in bold fonts.

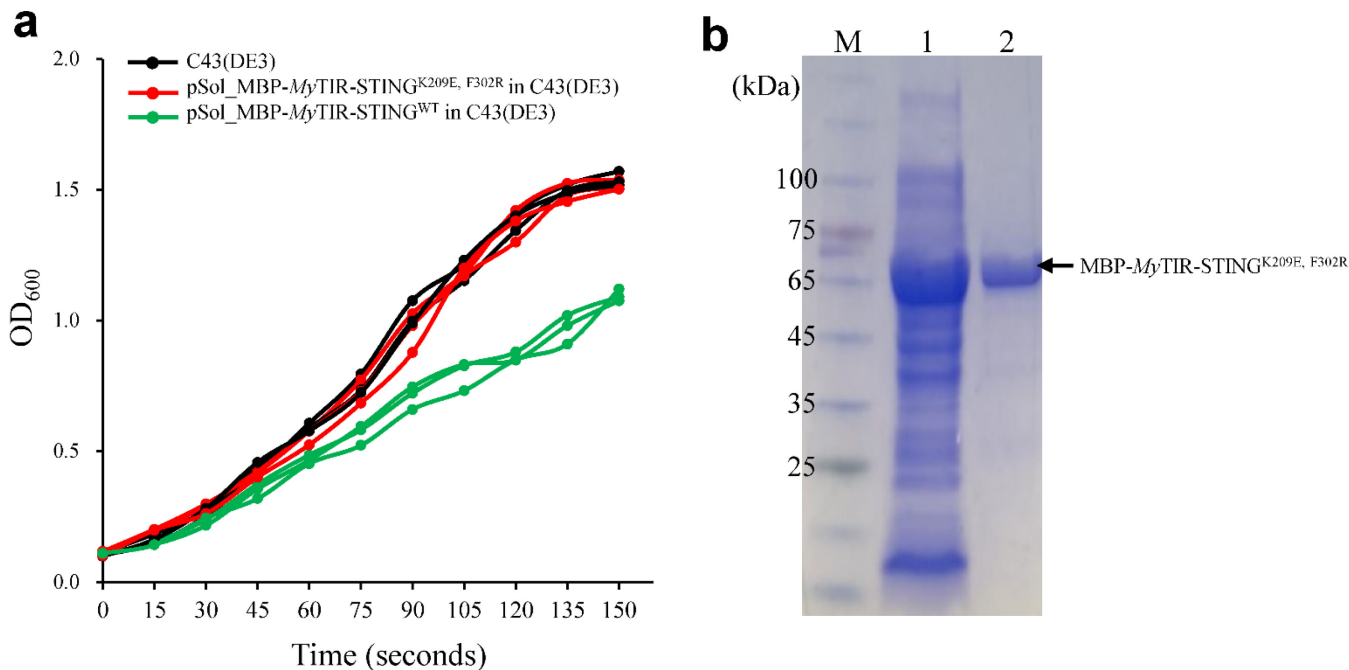

**Supplementary Fig. 9. Mutagenesis analysis of dimer-to-dimer interface of MyTIR-STING**

(a) Growth curves of *E. coli* C43(DE3) cells (black line), *E. coli* C43(DE3) cells overexpressing wildtype MBP-MyTIR-STING (green line) and MBP-MyTIR-STING<sup>K209E, F302R</sup> double mutant (red line). The data from three independent experiments are shown. (b) Overexpression and purification of MBP-MyTIR-STING<sup>K209E, F302R</sup>. Lane M, Marker. Lane 1, supernatant of *E. coli* lysates overexpressing MBP-MyTIR-STING<sup>K209E, F302R</sup>. Lane 2, purified MBP-MyTIR-STING<sup>K209E, F302R</sup> by Ni\_NTA chromatography. The estimated molecular size of purified MBP-MyTIR-STING<sup>K209E, F302R</sup> (~65 kDa) is smaller than the theoretical size of about 78 kDa, probably due to degradation. The unprocessed gel was provided in the Source Data file.

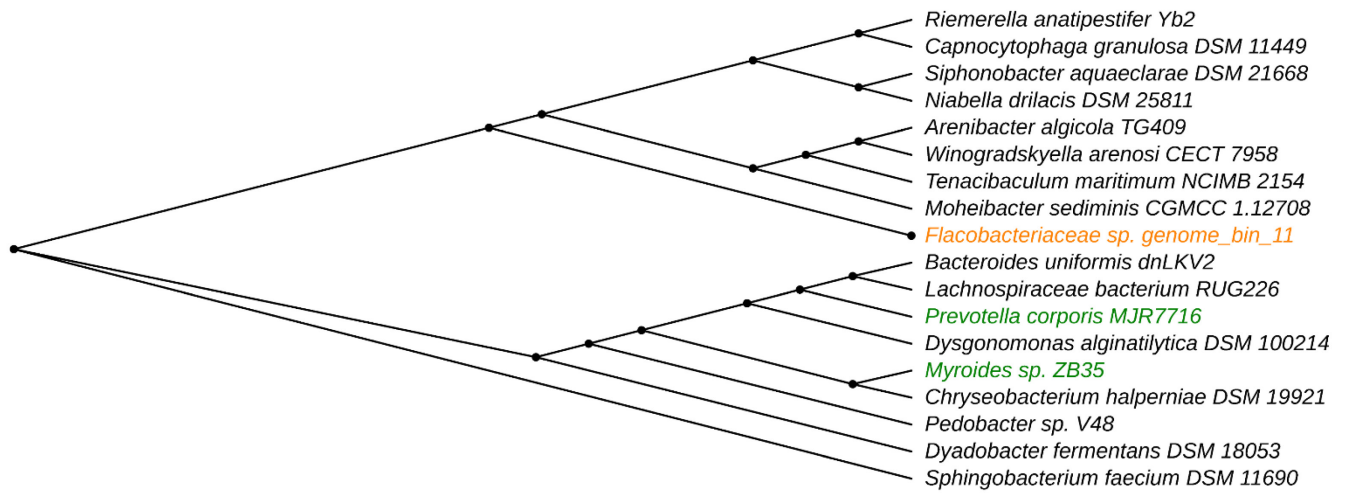

### Supplementary Fig. 10. Phylogenetic tree of bacterial STING proteins

Phylogenetic analysis of eighteen representative bacterial STING proteins by iTOL reveal that the divergent evolution of bacterial STING proteins occurs at an early stage and is consistent with the classification in this study, with Class II on the upper group and Class I on the lower group. The currently available crystal structures of Class I and Class II bacterial STING is colored by green and orange, respectively.



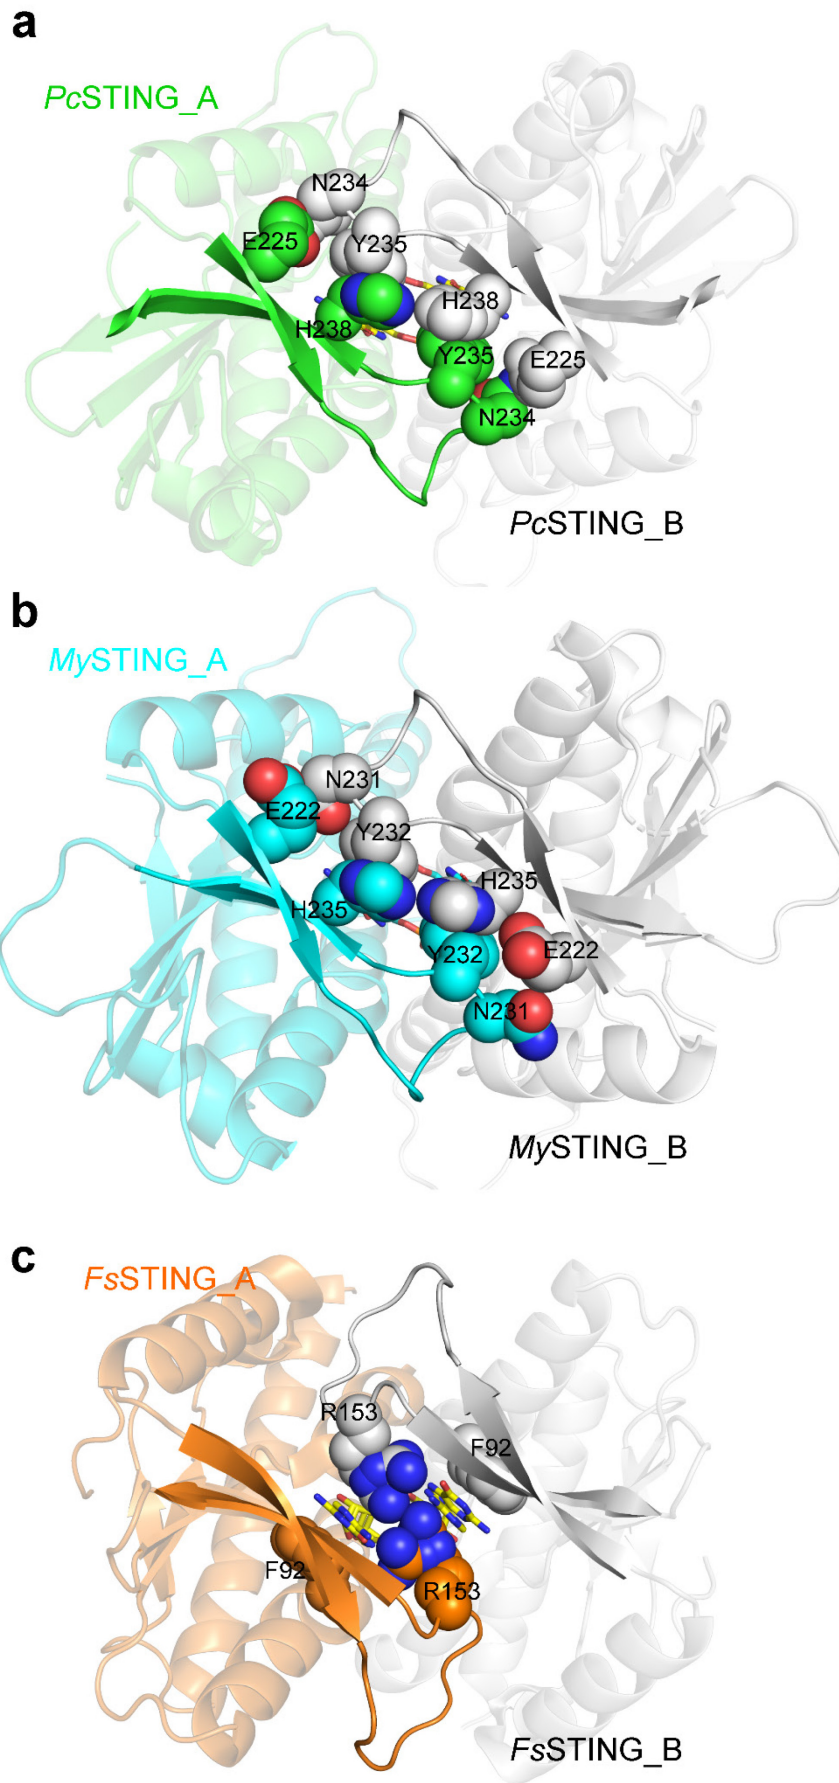

Supplementary Fig. 11.  $\beta$ -strand lid closure of bacterial STING induced by different cyclic

## di-nucleotides

(a-b) Fully closed  $\beta$ -strand lids covering the ligand binding pocket induced by binding of c-di-GMP to (a) *Pc*STING (green) and (b) *My*STING (cyan). (c) The 3',3'-cGAMP molecule stick the  $\beta$ -strand lids together by stacking interaction with R153 and F92 in *Fs*STING (orange). The interacting residues are shown in sphere and labeled. For clarity, protomer A of bacterial STING dimers was colored as indicated above and protomer B was shown in white.

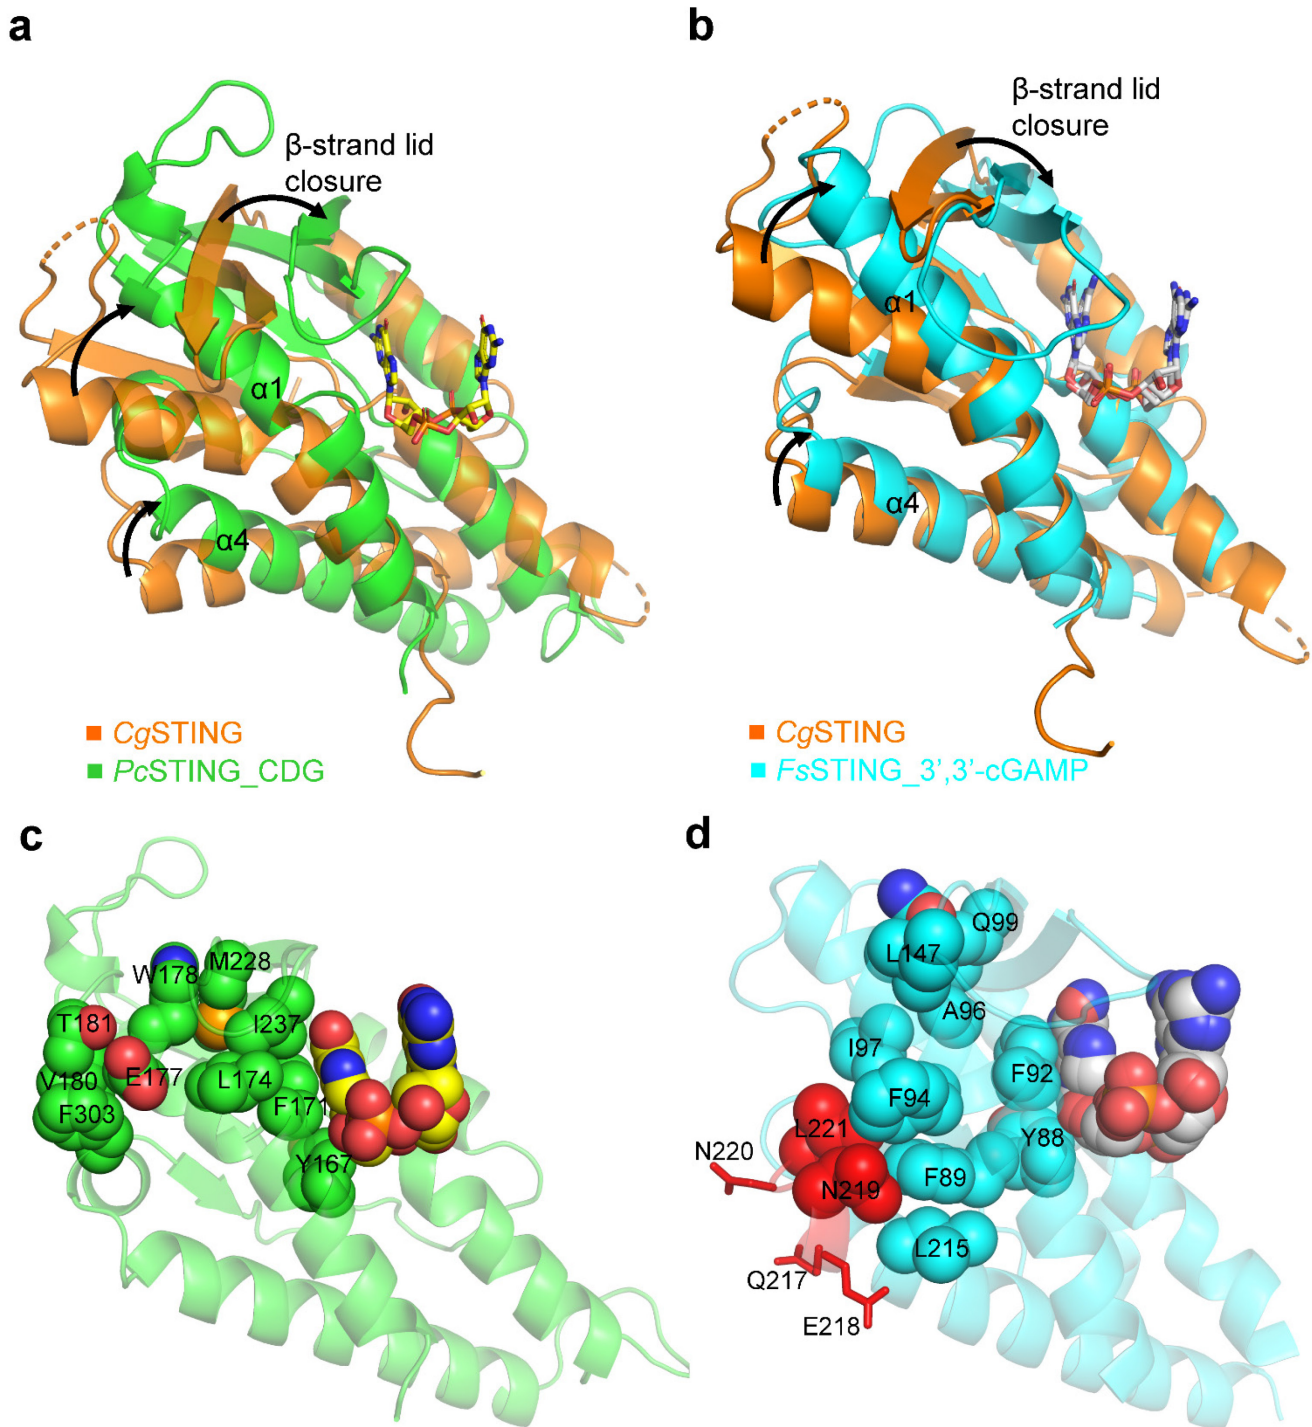

**Supplementary Fig. 12. Ligand induced conformational changes in bacterial STING proteins**

(a-b) Superimposition of ligand-free *CgSTING* (orange) with (a) CDG bound *PcSTING* (green) or (b) 3',3'-cGAMP bound *FsSTING* (cyan) showed the structural changes within  $\beta$ -strand lid,  $\alpha 1$  and  $\alpha 4$  helix (black arrows). (c-d) The residues mediated hydrophobic interactions between CDG,  $\beta$ -strand lid,  $\alpha 1$  and  $\alpha 4$  helix of (c) *PcSTING* and (d) *FsSTING* are indicated and shown in green

and cyan spheres, respectively. CDG and 3'3'-cGAMP are shown in yellow and white spheres, respectively.

**Supplementary Table 1. Data collection, phasing, model building, and refinement statistics of SeMet-PcSTING crystal.**

|                                                           | <b>Inflection</b>   | <b>Peak</b>                      | <b>High-remote</b>  |
|-----------------------------------------------------------|---------------------|----------------------------------|---------------------|
| <b>Data collection</b>                                    |                     |                                  |                     |
| Space group                                               |                     | P2 <sub>1</sub> 2 <sub>1</sub> 2 |                     |
| Wavelength (Å)                                            | 0.97860             | 0.97836                          | 0.96339             |
| Anomalous term f'                                         | -11.1923            | -7.9112                          | -3.1561             |
| Anomalous term f''                                        | 3.6502              | 6.8486                           | 3.6673              |
| Unit-cell a, b, c (Å)                                     | 94.75, 87.28, 35.24 | 94.53, 87.00, 35.22              | 94.75, 87.28, 35.24 |
| Resolution range (Å)                                      | 30-2.41 (2.50-2.41) | 30-2.25 (2.33-2.25)              | 30-2.42 (2.51-2.42) |
| Unique reflections                                        | 11935 (1171)        | 14459 (1410)                     | 11795 (1164)        |
| Redundancy                                                | 4.7 (4.5)           | 9.3 (9.0)                        | 4.6 (4.6)           |
| Completeness (%)                                          | 99.7 (99.8)         | 99.8 (100.0)                     | 99.6 (100.0)        |
| Average I / $\sigma(I)$                                   | 16.05 (2.98)        | 22.61 (3.80)                     | 16.30 (2.93)        |
| Average CC <sub>1/2</sub>                                 | 0.964 (0.882)       | 0.982 (0.929)                    | 0.961 (0.852)       |
| R <sub>merge</sub> (%)                                    | 9.7 (52.6)          | 10.6 (61.5)                      | 11.4 (66.0)         |
| R <sub>pim</sub> (%)                                      | 5.0 (27.5)          | 3.6 (21.5)                       | 3.3 (19.9)          |
| <b>Phasing and auto-building</b>                          |                     |                                  |                     |
| No. of Se sites found / total                             |                     | 12 / 14                          |                     |
| Figure of merit, Overall score                            |                     | 0.280, 48.1                      |                     |
| Initial / Final No. of amino acids                        |                     | 148 / 209                        |                     |
| Initial / Final map correlation                           |                     | 0.61 / 0.76                      |                     |
| Initial / Final R <sub>work</sub> , R <sub>free</sub> (%) |                     | 39.7, 42.8 / 29.8, 34.7          |                     |
| <b>Structure refinement</b>                               |                     |                                  |                     |
| No. of reflections                                        |                     | 14413 (1385)                     |                     |
| Completeness (%)                                          |                     | 99.7 (98.4)                      |                     |
| R <sub>work</sub> for 95% data (%)                        |                     | 18.8 (27.5)                      |                     |
| R <sub>free</sub> for 5% data (%)                         |                     | 24.9 (32.1)                      |                     |
| RMSD bond lengths (Å)                                     |                     | 0.0021                           |                     |
| RMSD bond angles (°)                                      |                     | 0.55                             |                     |
| B <sub>ave</sub> (Å <sup>2</sup> ) / protein atoms        |                     | 47.0 / 2532                      |                     |
| B <sub>ave</sub> (Å <sup>2</sup> ) / ligand atoms         |                     | 20.5 / 54                        |                     |
| B <sub>ave</sub> (Å <sup>2</sup> ) / water molecules      |                     | 53.4 / 262                       |                     |
| Ramachandran favored (%)                                  |                     | 97.1                             |                     |
| Ramachandran outliers (%)                                 |                     | 0.0                              |                     |
| Clashscore                                                |                     | 4.29                             |                     |
| MolProbity score                                          |                     | 1.48                             |                     |
| <b>PDB code</b>                                           |                     | <b>7EBD</b>                      |                     |



**Supplementary Table 2. Data collection and refinement statistics of MySTING crystal.**

| <b>Data collection</b>                               |                     |
|------------------------------------------------------|---------------------|
| Space group                                          | P2 <sub>1</sub>     |
| Unit-cell a, b, c (Å)                                | 35.25, 98.60, 50.66 |
| β (°)                                                | 108.18              |
| Resolution range (Å)                                 | 30-2.17 (2.25-2.17) |
| Unique reflections                                   | 17092 (1680)        |
| Redundancy                                           | 3.5 (3.0)           |
| Completeness (%)                                     | 98.3 (96.9)         |
| Average I / σ(I)                                     | 15.74 (3.12)        |
| Average CC <sub>1/2</sub>                            | 0.955 (0.859)       |
| R <sub>merge</sub> (%)                               | 8.2 (32.0)          |
| R <sub>pim</sub> (%)                                 | 5.2 (21.5)          |
| <b>Structure refinement</b>                          |                     |
| No. of reflections                                   | 16946 (1583)        |
| Completeness (%)                                     | 97.6 (91.9)         |
| R <sub>work</sub> for 95% data (%)                   | 17.8 (22.4)         |
| R <sub>free</sub> for 5% data (%)                    | 22.7 (30.7)         |
| RMSD bond lengths (Å)                                | 0.0043              |
| RMSD bond angles (°)                                 | 0.81                |
| B <sub>ave</sub> (Å <sup>2</sup> ) / protein atoms   | 34.6 / 2676         |
| B <sub>ave</sub> (Å <sup>2</sup> ) / ligand atoms    | 20.1 / 46           |
| B <sub>ave</sub> (Å <sup>2</sup> ) / water molecules | 38.6 / 229          |
| Ramachandran favored (%)                             | 97.6                |
| Ramachandran outliers (%)                            | 0.0                 |
| Clashscore                                           | 3.98                |
| MolProbity score                                     | 1.50                |
| <b>PDB code</b>                                      | <b>7EBL</b>         |

**Supplementary Table 3. The codon-optimized genes used in this study**

|                                                                                                                                                                                                                                                                                                                                                                                                                                                                                                                                                                                                                                                                                                                                                                                                                                                                                                                                                                                                                               |
|-------------------------------------------------------------------------------------------------------------------------------------------------------------------------------------------------------------------------------------------------------------------------------------------------------------------------------------------------------------------------------------------------------------------------------------------------------------------------------------------------------------------------------------------------------------------------------------------------------------------------------------------------------------------------------------------------------------------------------------------------------------------------------------------------------------------------------------------------------------------------------------------------------------------------------------------------------------------------------------------------------------------------------|
| <b><i>Prevotella corporis</i> TIR-STING (<i>Pc</i>TIR-STING)</b>                                                                                                                                                                                                                                                                                                                                                                                                                                                                                                                                                                                                                                                                                                                                                                                                                                                                                                                                                              |
| ATGAAGCCGCGTATCTTTATTGGTAGCAGCATCGAGGGCCTGGAAGTGGCGAAGCGTATTTAAAG<br>CTTCTTTAGCCCGGACTATGTTTGCTTCCTGTGGACCGATGAGATCTTTAAGAACAACAACAGCTT<br>CCTGGAAACCCTGGTGAAAAGCGCGAGCCTGTTTCGACTTTGGTTTCATGGTTTTAGCGCGGACG<br>ATAAGGCGGTGGTTCGTGAGAAAGGTTTCGACACCCCGCGTGATAACATTCTGTTTGAATATGGCC<br>TGTTCTGGGTCGTGTGGGCCTGGATCGTGCGTTCGTTATTGCGGAGAAGGACGCGAAAATCCC<br>GACCGATATGCTGGGTATTACCCAGACCCGTTACGAAATCACCATTCTGTGACGAGAAGAAAGTGG<br>CGACCGAAAGCCTGGAGGAAGGCCTGATCCTGCTGAAGAAACAAACCGATGAGAACCTGAAACT<br>GGGTCACCTGGGTCTGCTGCCGAGCACCGTTATCGCGATTAGCTATTTTGAAGTTTTCGTGAAGC<br>TGCGCGCGGAGTGGATCGTTACCGAAATGCCGACCACCGAGATTGACGGTAAAACCTACACCAG<br>CGGCAAGCTGTATATCAAATGCCGGAGACCCTGGACACCGATATTAAGAAAAGCGCGATGCTGTT<br>TTACAAGAAACAGGGCCTGAACGAAACCCAAATGAGCACCAACCACCGTAACTACCCGATCCACA<br>TTGTGAGCAAGGAAGAGGGTGACACCCTGGAAGTTTATGATATGCCGACCATCCTGAGCGGCATT<br>GACAAGGCGATCGATATGTACTTCCGTGTGGGTCACATCGGCAAACCCACCGAGCAGCAACTGGC<br>GGAGGACAACGAAATGAACAACCTTTAAACGTGTGCTGCAGCTGCTGATCAACGAAGATAGCTTCT<br>GCCGTGAGTGCGTTGAAATTCTG |
| <b><i>Myroides</i> sp. ZB35 TIR-STING (<i>My</i>TIR-STING)</b>                                                                                                                                                                                                                                                                                                                                                                                                                                                                                                                                                                                                                                                                                                                                                                                                                                                                                                                                                                |
| ATGAAGCCGCGTATCTTCATTGGTAGCAGCAGCGAAGGCCTGAAAATTGCGGAGTATATC<br>AAGCACAAACTGAGCGAGGAAGAGTTCGACGTGTTTATTTGGACCGACGATATCTTTAAG<br>GCGAACAACAGCGTTCTGGAAACCCTGCTGAAAGAGGCGAGCCTGTTTCGATTTTGGTCT<br>GATGATTGCGACCAAGGACGATTACACCACCAAGAAAGACATCGAATTCCAGACCCCGCG<br>TGATAACGTGGTTTTTCGAGTTTGGCCTGTTCTGGGTCGTCTGGGCGTGAACCGTGCGT<br>TTGTTCTGCAAGAAAAAGGTAGCGAGCTGCCGAGCGACCTGTACGGCATTACCGTGCCG<br>CGTTTCGACCTGACCGATAACTTTGAAAACAACCTATACCCTGAACAAGGAGATCGATAAGA<br>TCATTAGCAGCATCAAGGAAAAGATTCATCTGGGTGAACTGGGTCTGCTGCCGAGCACC                                                                                                                                                                                                                                                                                                                                                                                                                                                                                                   |

GTGCTGGCGATCGGTTACTTCGAAAACCTGGTTAACATCATTTGCGAGAGCCTGAACATG  
CTGCCGAAACTGGAAGTGAGCGGCAAGGAGTACAAGAAGTTCAAGTTCACCATCGTTATC  
CCGAAGGACCTGGATGCGAACATTAAGAAACGTGCGAAAATCTACTTCAAGCAGAAAAGC  
CTGATCGAAATTGAGATCCCGACCAGCAGCCGTAACCTATCCGATTCACATCCAATTTGACG  
AAAACAGCACCGACGATATTCTGCACCTGTACGACATGCCGACCACCATTGGTGGCATCG  
ATAAGGCGATTGAGATGTTTCATGCGTAAGGGTCACATCGGCAAAACCGACCAGCAAAGC  
TGCTGGAAGAGCGTGAACCTGCGTAACTTCAAGACCACCCTGGAGAACCTGATCGCGACC  
GATGCGTTTGCGAAAGAAATGGTTGAGGTGATCATTGAAGAG

## Supplementary Table 4. Primers used in this study

### PCR primers:

|                           |                                                                             |
|---------------------------|-----------------------------------------------------------------------------|
| pET-SUMO_PcTIR-STING_F1   | 5'- <u>GAACAGATTGGTGGT</u> <u>TCCGGAGGAGGA</u> ATGAA<br>GCCGCGTATCTTT-3'    |
| pET-SUMO_PcTIR-STING_F158 | 5'- <u>GAACAGATTGGTGGT</u> <u>TCCGGAGGAGGA</u> CTGCC<br>GAGCACCGTTATC-3'    |
| pET-SUMO_PcTIR-STING_R311 | 5'- <u>TACCTAAGCTTGTCT</u> CAGAATTTCAACGCACTCA<br>CGGCAG-3'                 |
| pSol_MyTIR-STING_F1       | 5'- <u>AATCTGTACTTCCAGGGT</u> <u>TCCGGAGGAGGA</u> ATG<br>AAGCCGCGTATCTTC-3' |
| pSol_MyTIR-STING_F148     | 5'- <u>AATCTGTACTTCCAGGGT</u> ATTCATCTGGGTGAAC<br>TG                        |
| pSol_MyTIR-STING_R313     | 5'- <u>GTGGCGGCCGCTCTATTA</u> CTCTTCAATGATCACC<br>TCAAC-3'                  |

The sequences underline in red are additional linker region (Ser-Gly-Gly-Gly) added to the N-terminal of target protein.

The sequences underline in green are required for cloning into the pET-SUMO Vector.

The sequences underline in blue are required for cloning into the pSol Vectors.

### Mutagenic primers:

|                          |                                        |
|--------------------------|----------------------------------------|
| <b>PcTIR-STING_D252A</b> |                                        |
| Forward primer           | ACACCCTGGAAGTTTATGCTATGCCGACCATCCTGAG  |
| Reverse primer           | CTCAGGATGGTCGGCATAGCATAAACTTCCAGGGTGT  |
| <b>PcTIR-STING_R233A</b> |                                        |
| Forward primer           | CAAATGAGCACCAACCACGCTAACTACCCGATCCACAT |
| Reverse primer           | ATGTGGATCGGGTAGTTAGCGTGGTTGGTGCTCATTG  |

|                          |                                            |
|--------------------------|--------------------------------------------|
| <b>MyTIR-STING_Y232R</b> |                                            |
| Forward primer           | CCCGACCAGCAGCCGTAACCGTCCGATTCACATCCAATT    |
| Reverse primer           | AATTGGATGTGAATCGGACGGTTACGGCTGCTGGTCGGG    |
| <b>MyTIR-STING_K209E</b> |                                            |
| Forward primer           | CCTGGATGCGAACATTAAGGAACGTGCGAAAATCTACTTC   |
| Reverse primer           | GAAGTAGATTTTCGCACGTTCCCTTAATGTTTCGCATCCAGG |
| <b>MyTIR-STING_F302A</b> |                                            |
| Forward primer           | CCTGATCGCGACCGATGCGGCTGCGAAAGAAATGGTTGA    |
| Reverse primer           | TCAACCATTTCTTTTCGCAGCCGCATCGGTTCGCGATCAGG  |
| <b>MyTIR-STING_F302R</b> |                                            |
| Forward primer           | CCTGATCGCGACCGATGCGCGTGCGAAAGAAATGGTTGA    |
| Reverse primer           | TCAACCATTTCTTTTCGCACGCGCATCGGTTCGCGATCAGG  |
